# Supplementary material for: Moist convection drives an upscale energy transfer at Jovian high latitudes
Source: Springer Nature journal article supplement (doi:10.1038/s41567-021-01458-y), 2022-01-10
Supplement: MOESM1 [file 41567_2021_1458_MOESM1_ESM.pdf]

---

**Supplementary information**

---

**Moist convection drives an upscale energy transfer at Jovian high latitudes**

---

In the format provided by the  
authors and unedited

## README

### `mapped_brightness.tar.gz`

This file contains the brightness maps used to construct the 4 mosaics n01 to n04. Each mosaic is composed of 12 images (a to l). For example n01a.map is the first image of the mosaic n01.

The .map files can be opened in python with `vicar.py` available here

<https://github.com/SETI/pds-tools/blob/master/vicar.py>. More information can be found here : [https://www-mipl.jpl.nasa.gov/vicar\\_open.html](https://www-mipl.jpl.nasa.gov/vicar_open.html)

### `velocity_vector.zip`

This file contains the velocity vectors derived by tracking feature between successive mosaics. Measurements of feature displacement between the second image (letter b) of the first and third sequences (n01 and n03) would be n0103bb, a combination of n01b and n03b (n for north). Images in different series of twelve overlapped with at most three images of other series, e.g., n0103aa, n0103ab, n0103bb, n0103ba all contributed to the mosaic which we called n0103. Images that were more than one step different in their respective series were disjoint - having no elements in common - so there are no n0103bd, n0103be, etc., files.

The .tp4 files can be opened in python with `vicar.py` available here

<https://github.com/SETI/pds-tools/blob/master/vicar.py>. More information can be found here : [https://www-mipl.jpl.nasa.gov/vicar\\_open.html](https://www-mipl.jpl.nasa.gov/vicar_open.html)
